# Supplementary material for: IFN-Type-I Response and Systemic Immunity in Rectal Adenocarcinoma Patients Treated with Conventional or Hypofractionated Neoadjuvant Radiotherapy
Source: MDPI journal article supplement (doi:10.3390/biom14040448), 2024-04-06

**Table S1**

|                                         | scRT   | lcRT   |
|-----------------------------------------|--------|--------|
| No. patients                            | 22     | 40     |
| Gender                                  |        |        |
| Male                                    | 14     | 31     |
| Female                                  | 8      | 9      |
| Age                                     |        |        |
| Range                                   | 52-85  | 28-87  |
| Median                                  | 68     | 71     |
| PS                                      |        |        |
| 0                                       | 19     | 33     |
| 1                                       | 3      | 7      |
| Histological type                       |        |        |
| Adenocarcinoma NOS                      | 22     | 40     |
| Distance from anorectal ring (cm)       |        |        |
| Range/median                            | 1-12/5 | 1-12/4 |
| cT stage (MRI)                          |        |        |
| T2*                                     | 1      | 0      |
| T3                                      | 21     | 40     |
| cN status (MRI)                         |        |        |
| Positive                                | 21     | 36     |
| Negative                                | 1      | 4      |
| Tumor regression grade (TRG) AJCC/CAP** |        |        |
| 0                                       | 3      | 4      |
| 1                                       | 7      | 4      |
| 2                                       | 10     | 24     |
| 3                                       | 2      | 8      |

Figure S1

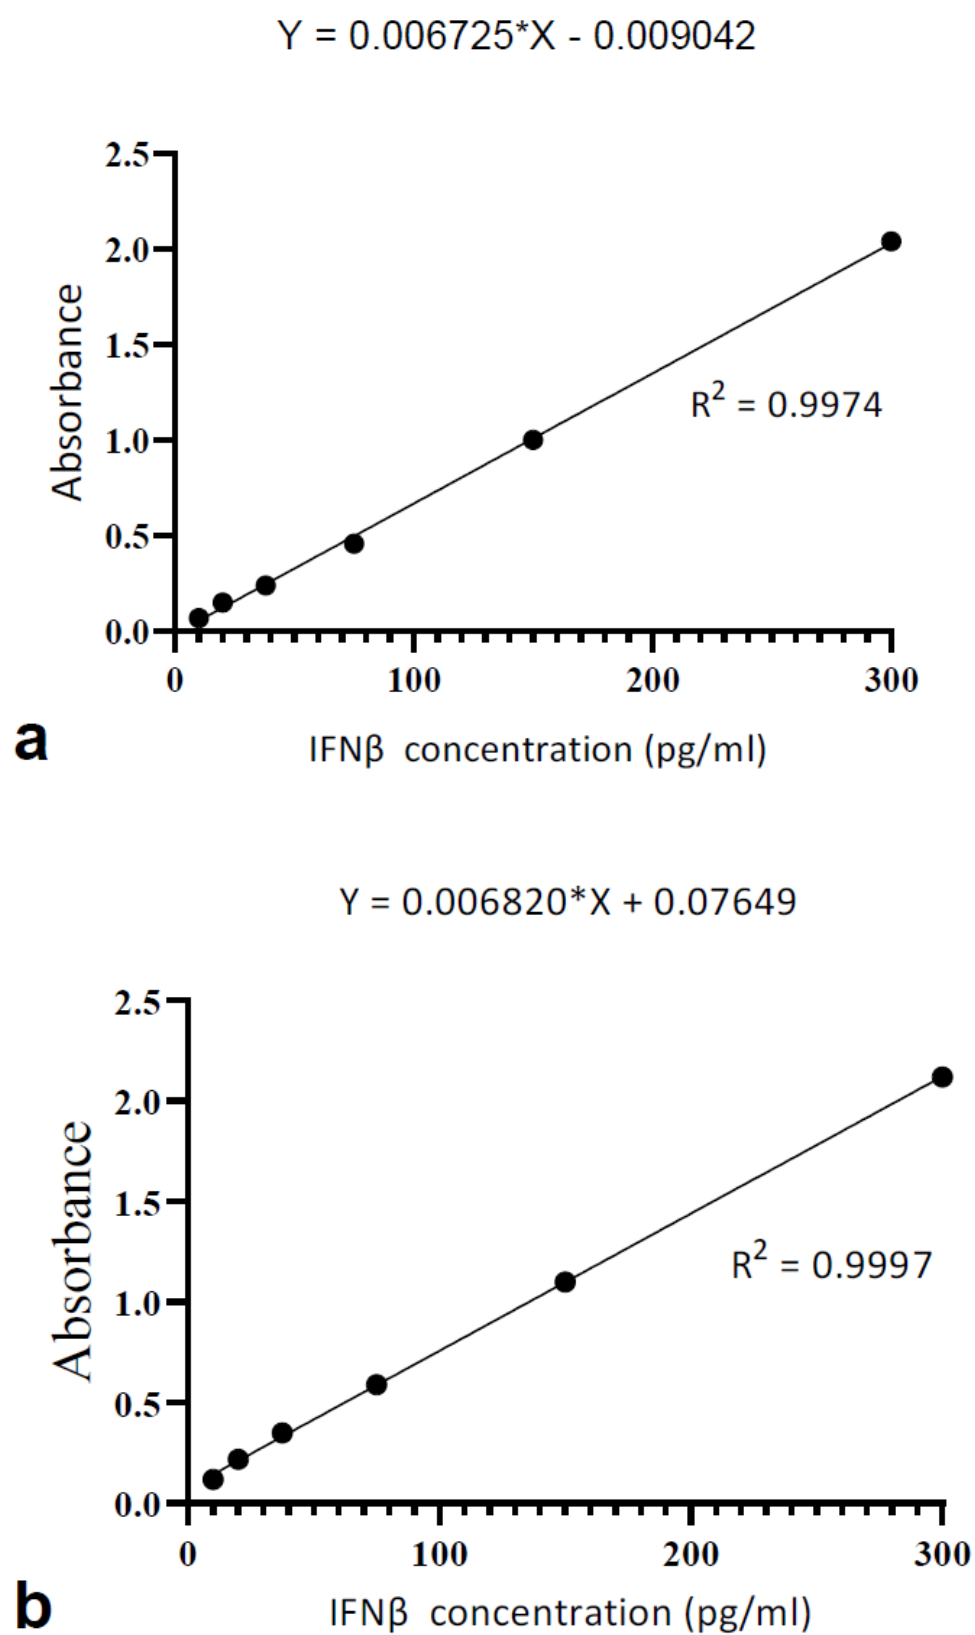

Supplement: s1 [file s1]
